# Supplementary material
Source: publisher site journal article supplement (https://www.spandidos-publications.com/7193/downloadSupplementary)
Supplement: Supplementary file 1 [file downloadSupplementary]

Table SI. Detailed clinical information of the participants.

| ID | Disease | Age,<br>years | Sex | Taken medicines                                                                                                                                                 | Antibiotics for the<br>operation | Clinical<br>presentation | Duration until<br>surgery from<br>the last clinical<br>presentation | Subtype of<br>MMD | Aneurysm<br>location/size | Epileptic<br>origin |
|----|---------|---------------|-----|-----------------------------------------------------------------------------------------------------------------------------------------------------------------|----------------------------------|--------------------------|---------------------------------------------------------------------|-------------------|---------------------------|---------------------|
| 1  | MMD     | 64            | F   | Cilostazol 100 mg/day,<br>atorvastatin 10 mg/day                                                                                                                | Cefazolin 1 g                    | ICH                      | 2 months                                                            | One side          | -                         | -                   |
| 2  | MMD     | 47            | F   | Aspirin 100 mg/day,<br>Lansoprazole 15 mg/day,<br>Atorvastatin Calcium Hydrate 10<br>mg/day,<br>Tsumura Goreisan 2.5g/day,<br>Bepotastine<br>Besilate 10 mg/day | Cefazolin 1 g                    | IF                       | 8 months                                                            | Bilateral         | -                         | -                   |
| 3  | MMD     | 48            | F   | Amlodipine Besilate 5<br>mg/day                                                                                                                                 | Cefazolin 1 g                    | ICH                      | 6 months                                                            | Bilateral         | -                         | -                   |
| 4  | MMD     | 49            | F   | Aspirin 100 mg/day                                                                                                                                              | Cefazolin 1 g                    | TIA                      | 9 months                                                            | Bilateral         | -                         | -                   |
| 5  | MMD     | 59            | F   | Cilostazol 100 mg/day,<br>Esomeprazole Magnesium<br>Hydrate 20 mg/day                                                                                           | Cefazolin 1 g                    | IF                       | 11 months                                                           | Bilateral         | -                         | -                   |
| 6  | MMD     | 50            | F   | Cilostazol 100 mg/day,<br>Olopatadine<br>Hydrochloride 5 mg/day                                                                                                 | Cefazolin 1 g                    | TIA                      | 1 month                                                             | Bilateral         | -                         | -                   |
| 7  | MMD     | 45            | F   | Aspirin 100 mg/day,<br>Lansoprazole 15 mg/day,<br>Clopidogrel Sulfate 75<br>mg/day, Pitavastatin Calcium Hydrate 2<br>mg/day                                    | Cefazolin 1 g                    | IF                       | 1 year and 1<br>month                                               | Bilateral         | -                         | -                   |
| 8  | MMD     | 48            | F   | Aspirin 100 mg/day,<br>Lansoprazole 15 mg/day,<br>Celecoxib 100 mg/day                                                                                          | Cefazolin 1g                     | TIA                      | 3 months                                                            | Bilateral         | -                         | -                   |

|    |     |    |   |                                                                                            |                |     |                     |           |   |   |
|----|-----|----|---|--------------------------------------------------------------------------------------------|----------------|-----|---------------------|-----------|---|---|
| 9  | MMD | 51 | M | Aspirin 100 mg, Etizolam 0.5 mg/day, Olmesartan Medoxomil 10 mg/day, Azelnidipine 8 mg/day | Cefazolin 1 g  | TIA | 1 month             | Bilateral | - | - |
| 10 | MMD | 53 | F | Aspirin 100 mg/day, Lansoprazole 15 mg/day                                                 | Cefazolin 1 g  | TIA | 7 months            | Bilateral | - | - |
| 11 | MMD | 43 | F | Aspirin 100 mg, /day Lansoprazole 15 mg/day, Telmisartan 40 mg/day                         | Cefazolin 1 g  | TIA | 1 year and 2 months | Bilateral | - | - |
| 12 | MMD | 34 | F | Aspirin 100 mg/day                                                                         | Cefazolin 1 g  | TIA | 5 months            | Bilateral | - | - |
| 13 | MMD | 29 | F | Levetiracetam 1000 mg/day, Phenytoin 300 mg/day, Sodium Ferrous Citrate 100 mg/day         | Cefazolin 1 g  | ICH | 7 months            | Bilateral | - | - |
| 14 | MMD | 32 | M | Aspirin 100 mg/day, Lansoprazole 15 mg/day                                                 | Cefazolin 1 g  | TIA | Several days        | Bilateral | - | - |
| 15 | MMD | 7  | F | No                                                                                         | Cefazolin 1 g  | TIA | Several days        | Bilateral | - | - |
| 16 | MMD | 27 | M | Aspirin 100 mg/day, Esomeprazole Magnesium Hydrate 20 mg/day                               | Cefazolin 1 g  | TIA | 8 months            | Bilateral | - | - |
| 17 | MMD | 5  | M | Aspirin 30 mg/day                                                                          | Cefazolin 0.3g | IF  | 3 months            | Bilateral | - | - |
| 18 | MMD | 39 | M | No                                                                                         | Cefazolin 1 g  | TIA | 7 months            | Bilateral | - | - |
| 19 | MMD | 11 | M | Cilostazol 150 mg/day                                                                      | Cefazolin 0.5g | TIA | 2 months            | Bilateral | - | - |
| 20 | MMD | 46 | F | Sodium Ferrous Citrate 50 mg/day, Olopatadine Hydrochloride 10 mg/day                      | Cefazolin 1 g  | TIA | 2 months            | Bilateral | - | - |
| 21 | MMD | 35 | F | Pregabalin 225 mg/day, Amitriptyline Hydrochloride 35 mg/day, Desloratadine 5 mg/day       | Cefazolin 1 g  | TIA | 8 months            | Bilateral | - | - |

|    |    |    |   |                                                                                                                                                                                                                     |               |                        |              |   |                |   |
|----|----|----|---|---------------------------------------------------------------------------------------------------------------------------------------------------------------------------------------------------------------------|---------------|------------------------|--------------|---|----------------|---|
| 22 | IA | 62 | F | Loxoprofen Sodium Hydrate 180 mg/day, Rebamipide 300 mg/day, Brotizolam 0.25 mg/day, Diazepam 2 mg/day                                                                                                              | Cefazolin 1 g | No                     | -            | - | ICA/27mm       | - |
| 23 | IA | 78 | F | Etizolam 0.5 mg/day, Tandospirone Citrate 20 mg/day, Kallidinogenase 100 units/day, Magnesium Oxide 660 mg/day                                                                                                      | Cefazolin 1 g | No                     | -            | - | Cavernous/28mm | - |
| 24 | IA | 79 | F | Aspirin 100 mg/day, Cilostazol 100 mg/day, Acetaminophen 1200 mg/day, Mecobalamin 1500 µg/day, Benidipine Hydrochloride 4 mg/day, Ezetimibe 10 mg/day, Rosuvastatin Calcium 5 mg/day, Candesartan Cilxetil 8 mg/day | Cefazolin 1 g | Oculomotor nerve palsy | 1 month      | - | Cavernous/26mm | - |
| 25 | IA | 70 | F | Valsartan 160 mg/day, Amlodipine Besilate 10 mg/day, Imidapril Hydrochloride 5 mg/day, Doxazosin Mesilate 2 mg/day, methotrexate 10 mg/week                                                                         | Cefazolin 1 g | Oculomotor nerve palsy | Several days | - | Cavernous/20mm | - |

|    |     |    |   |                                                                                                                                                                                                                                                                 |               |                                   |              |   |                |               |
|----|-----|----|---|-----------------------------------------------------------------------------------------------------------------------------------------------------------------------------------------------------------------------------------------------------------------|---------------|-----------------------------------|--------------|---|----------------|---------------|
| 26 | IA  | 65 | F | Clopidogrel Sulfate 75 mg/day, Atorvastatin Calcium Hydrate 10 mg/day, L-Carbocysteine 1500 mg, Mecobalamin 1500 µg/day, d-Chlorpheniramine Maleate 6 mg/day, Betamethasone 0.5mg/day, d-Chlorpheniramine Maleate 4 mg/day, Olopatadine Hydrochloride 20 mg/day | Cefazolin 1 g | Oculomotor nerve palsy, head ache | Several days | - | Cavernous/27mm | -             |
| 27 | IA  | 71 | F | Aspirin 100 mg/day, Esomeprazole Magnesium Hydrate 20 mg/day, Valsartan 80 mg/day, Amlodipine Besilate 5 mg/day, Suvorexant 15 mg/day                                                                                                                           | Cefazolin 1 g | No                                | -            | - | ICA/21mm       | -             |
| 28 | EPI | 56 | M | Levetiracetam 2000 mg/day, Lamotrigine 300 mg/day, Perampanel Hydrate 4 mg/day, Pravastatin Sodium 20 mg/day                                                                                                                                                    | Cefazolin 1 g | Seizures                          | Several days | - | -              | Temporal lobe |
| 29 | EPI | 14 | M | Lacosamide 300 mg/day, Clobazam 15 mg/day, Perampanel Hydrate 6 mg/day                                                                                                                                                                                          | Cefazolin 1 g | Seizures                          | Several days | - | -              | Frontal lobe  |

|    |     |    |   |                                                                                                                       |                       |          |              |           |                        |                  |
|----|-----|----|---|-----------------------------------------------------------------------------------------------------------------------|-----------------------|----------|--------------|-----------|------------------------|------------------|
| 30 | EPI | 20 | M | Lacosamide 400 mg/day,<br>Lamotrigine 200 mg/day,<br>Carbamazepine 400<br>mg/day                                      | Cefazolin 1 g         | Seizures | Several days | -         | -                      | Frontal<br>lobe  |
| 31 | EPI | 43 | F | Carbamazepine 300<br>mg/day, Atorvastatin<br>Calcium Hydrate 5<br>mg/day, Fexofenadine<br>Hydrochloride 120<br>mg/day | Cefazolin 1 g         | Seizures | Several days | -         | -                      | Temporal<br>lobe |
| 32 | EPI | 2  | M | Levetiracetam 325<br>mg/day, Zonisamid 16<br>mg/day                                                                   | Cefotaxime<br>0.5 g   | Seizures | Several days | -         | -                      | Frontal<br>lobe  |
| 33 | MMD | 64 | F | Atorvastatin 10<br>mg/day                                                                                             | Cefazolin 1 g         | ICH      | 2 months     | Bilateral | -                      | -                |
| 34 | MMD | 47 | F | Aspirin 100 mg/day,<br>atorvastatin 10 mg/day                                                                         | Ceftriaxone 2 g       | TIA      | 5 months     | Bilateral | -                      | -                |
| 35 | MMD | 48 | F | Amlodipine 5 mg/day                                                                                                   | Ceftriaxone 2 g       | ICH      | 6 months     | Bilateral | -                      | -                |
| 36 | MMD | 49 | F | Aspirin 100 mg/day                                                                                                    | Cefazolin 1 g         | TIA      | 6 months     | Bilateral | -                      | -                |
| 37 | MMD | 59 | F | Cilostazol 200 mg/day                                                                                                 | Cefazolin 1 g         | IF       | 11 months    | Bilateral | -                      | -                |
| 38 | MMD | 50 | F | Cilostazol 200 mg/day                                                                                                 | Cefazolin 1 g         | IF       | 8 months     | Bilateral | -                      | -                |
| 39 | MMD | 45 | F | Aspirin 100 mg/day, clopidogrel 75<br>mg/day                                                                          | Clindamycin 600<br>mg | TIA      | 1 month      | Bilateral | -                      | -                |
| 40 | MMD | 48 | F | Aspirin 100 mg/day                                                                                                    | Cefazolin 1 g         | TIA      | 4 months     | Bilateral | -                      | -                |
| 41 | MMD | 51 | M | Aspirin 100 mg/day,<br>olmesartan 20 mg/day, azelnidipine 16<br>mg/day, pitavastatin 2 mg/day                         | Cefazolin 1 g         | TIA      | 2 months     | Bilateral | -                      | -                |
| 42 | MMD | 53 | F | Aspirin 100 mg/day                                                                                                    | Cefazolin 1 g         | TIA      | 4 months     | Bilateral | -                      | -                |
| 43 | MMD | 43 | F | Aspirin 100 mg/day, telmisartan 80<br>mg/day                                                                          | Cefazolin 1 g         | TIA      | 10 months    | Bilateral | -                      | -                |
| 44 | IA  | 62 | F | No                                                                                                                    | Cefazolin 1 g         | No       | -            | -         | Supraclinoid/ 27<br>mm | -                |

|    |     |    |   |                                                                                                                                    |                 |                        |              |   |                     |               |
|----|-----|----|---|------------------------------------------------------------------------------------------------------------------------------------|-----------------|------------------------|--------------|---|---------------------|---------------|
| 45 | IA  | 78 | F | No                                                                                                                                 | Cefazolin 1 g   | Oculomotor nerve palsy | 5 months     | - | Cavernous/ 30 mm    | -             |
| 46 | IA  | 79 | F | Cilostazol 100 mg/day, candesartan 8 mg/day, benidipine 4 mg/day, rosuvastatine 5 mg/day, ezetimibe 10 mg/day                      | Cefmetazole 1 g | Oculomotor nerve palsy | 6 months     | - | Cavernous/ 25 mm    | -             |
| 47 | IA  | 70 | F | Clopidogrel 75 mg/day, valsartan 160 mg/day, amlodipine 10 mg/day, imidapril 5 mg/day, doxazosin 2 mg/day, methotrexate 10 mg/week | Cefazolin 1 g   | Oculomotor nerve palsy | 7 months     | - | Cavernous/ 20 mm    | -             |
| 48 | IA  | 65 | F | Clopidogrel 75 mg/day, atorvastatin 10 mg/day                                                                                      | Cefazolin 1 g   | No                     | -            | - | Cavernous/ 26 mm    | -             |
| 49 | IA  | 71 | F | Aspirin 100 mg/day, valsartan 160 mg/day, amlodipine 5 mg/day                                                                      | Cefazolin 1 g   | No                     | -            | - | Supraclinoid/ 22 mm | -             |
| 50 | EPI | 56 | M | Pravastatin 20 mg, levetiracetam 2000 mg/day, lamotrigine 300 mg/day, perampanel 4 mg/day                                          | Cefazolin 1 g   | Seizures               | Several days | - | -                   | Temporal lobe |
| 51 | EPI | 14 | M | Lacosamide 300 mg/day, perampanel 6 mg/day, clobazam 15 mg/day                                                                     | Cefazolin 1 g   | Seizures               | Several days | - | -                   | Frontal lobe  |
| 52 | EPI | 20 | M | Lacosamide 300 mg/day, lamotrigine 200 mg/day, carbamazepine 400 mg/day                                                            | Cefazolin 1 g   | Seizures               | Several days | - | -                   | Frontal lobe  |

The information of participants was obtained from the datasets GSE189993 and GSE157628, which were from published studies (1,2). MMD, moyamoya disease; F, female; M, male; IA, intracranial aneurysm; EPI, epilepsy; ONP, ocular nerve palsy; ICH, intracerebral hemorrhage; IF, infarction; TIA, transient ischemic attack; ICA, internal carotid artery; MCA, middle cerebral artery.

Table SII. Clinical and demographic characteristics of MMD participants.

| No. of   |        |     | Age,  |              |          | Coronary heart |                | Smoking history, | Alcohol            | Duration of      | Suzuki |
|----------|--------|-----|-------|--------------|----------|----------------|----------------|------------------|--------------------|------------------|--------|
| Patients | Groups | Sex | years | Hypertension | Diabetes | disease        | Hyperlipidemia | years            | consumption, years | symptoms, months | stage  |
| P1       | MMD    | M   | 41    | NO           | NO       | NO             | NO             | NO               | NO                 | 8                | L5/R4  |
| P2       | MMD    | F   | 39    | NO           | NO       | NO             | NO             | NO               | NO                 | 6                | L1/R3  |
| P3       | MMD    | F   | 51    | NO           | NO       | NO             | NO             | NO               | NO                 | 6                | L3/R3  |
| P4       | HC     | M   | 38    | NO           | NO       | NO             | NO             | NO               | NO                 | -                | -      |
| P5       | HC     | F   | 30    | NO           | NO       | NO             | NO             | NO               | NO                 | -                | -      |
| P6       | HC     | F   | 45    | NO           | NO       | NO             | NO             | NO               | NO                 | -                | -      |

MMD, moyamoya disease; HC, healthy controls; F, female; M, male.

Table SIII. Correlation analysis between hub genes and endothelial migration-related genes.

| Gene1   | Gene2   | Cor    | P-value               |
|---------|---------|--------|-----------------------|
| OSBPL11 | GIPC1   | -0.613 | 2.61x10 <sup>-5</sup> |
| NEIL2   | SOX18   | -0.575 | 0.000105              |
| NEIL2   | LPXN    | 0.571  | 0.00012               |
| MSMO1   | STAT1   | 0.565  | 0.000147              |
| WDR27   | PIK3CA  | 0.55   | 0.000234              |
| MSMO1   | LGALS8  | 0.525  | 0.000507              |
| MSMO1   | CEL     | -0.521 | 0.000561              |
| MSMO1   | PIK3CA  | 0.499  | 0.001058              |
| OSBPL11 | NR4A1   | -0.498 | 0.001089              |
| WDR27   | LGALS8  | 0.487  | 0.001432              |
| OSBPL11 | PRSS3   | -0.485 | 0.00152               |
| OSBPL11 | LPXN    | 0.484  | 0.001574              |
| OSBPL11 | CYP1B1  | 0.478  | 0.001816              |
| WDR27   | NR4A1   | -0.476 | 0.001929              |
| OSBPL11 | CDH13   | 0.475  | 0.001939              |
| OSBPL11 | S100P   | 0.472  | 0.002119              |
| MSMO1   | VEGFA   | -0.471 | 0.002148              |
| NEIL2   | PRKX    | 0.47   | 0.002226              |
| WDR27   | PRSS3   | -0.467 | 0.002407              |
| MSMO1   | PXN     | -0.465 | 0.002477              |
| OSBPL11 | S100A9  | 0.455  | 0.003185              |
| WDR27   | PLXND1  | -0.448 | 0.003757              |
| WDR27   | CDH13   | 0.442  | 0.004329              |
| OSBPL11 | RAB13   | 0.441  | 0.004433              |
| MSMO1   | ID1     | -0.434 | 0.005138              |
| WDR27   | CEL     | -0.433 | 0.005208              |
| MSMO1   | PRSS3   | -0.425 | 0.006212              |
| OSBPL11 | S100A12 | 0.417  | 0.007445              |
| WDR27   | S100A9  | -0.412 | 0.008209              |
| MSMO1   | NOS3    | -0.407 | 0.009206              |

|         |         |        |          |
|---------|---------|--------|----------|
| NEIL2   | CYP1B1  | 0.392  | 0.012367 |
| WDR27   | CORO1B  | 0.389  | 0.013131 |
| NEIL2   | GIPC1   | -0.388 | 0.0134   |
| OSBPL11 | PRKX    | 0.387  | 0.013689 |
| MSMO1   | S100A9  | -0.382 | 0.014871 |
| WDR27   | PXN     | -0.379 | 0.015771 |
| WDR27   | ABL1    | 0.379  | 0.016019 |
| OSBPL11 | MYH9    | -0.377 | 0.016406 |
| OSBPL11 | CEL     | -0.365 | 0.020543 |
| MSMO1   | NR4A1   | -0.363 | 0.021365 |
| OSBPL11 | NELL1   | -0.363 | 0.021406 |
| NEIL2   | NR4A1   | -0.361 | 0.021995 |
| NEIL2   | STAT1   | 0.354  | 0.025071 |
| WDR27   | EGR3    | -0.352 | 0.02576  |
| OSBPL11 | PIK3CA  | 0.351  | 0.026571 |
| MSMO1   | CORO1B  | 0.35   | 0.026677 |
| WDR27   | NOS3    | -0.342 | 0.030879 |
| NEIL2   | CDH13   | 0.328  | 0.03853  |
| NEIL2   | EGR3    | -0.327 | 0.039268 |
| MSMO1   | NELL1   | -0.327 | 0.039584 |
| OSBPL11 | SOX18   | -0.322 | 0.042822 |
| NEIL2   | TNFSF12 | 0.321  | 0.043481 |
| NEIL2   | NELL1   | -0.318 | 0.045749 |
| NEIL2   | S100P   | 0.312  | 0.049789 |

---

Table SIV. Correlation analysis between hub genes and endothelial proliferation-related genes.

| Gene1   | Gene2    | Cor    | P-value               |
|---------|----------|--------|-----------------------|
| MSMO1   | MSMO1    | 1      | 0                     |
| NEIL2   | NEIL2    | 1      | 0                     |
| MSMO1   | WDR27    | 0.737  | 5.94x10 <sup>-8</sup> |
| MSMO1   | SEMA5A   | 0.582  | 8.22x10 <sup>-5</sup> |
| WDR27   | DLG1     | 0.576  | 0.0001                |
| MSMO1   | ITGB1BP1 | 0.558  | 0.000185              |
| OSBPL11 | PROK2    | 0.543  | 0.000297              |
| NEIL2   | OSBPL11  | 0.537  | 0.000356              |
| WDR27   | SEMA5A   | 0.536  | 0.00036               |
| MSMO1   | DLG1     | 0.525  | 0.000504              |
| NEIL2   | PRKX     | 0.47   | 0.002226              |
| MSMO1   | THAP1    | 0.443  | 0.004224              |
| WDR27   | ITGB1BP1 | 0.441  | 0.004385              |
| MSMO1   | PROK1    | -0.44  | 0.004454              |
| OSBPL11 | NRARP    | -0.437 | 0.004784              |
| MSMO1   | NRARP    | -0.432 | 0.005376              |
| NEIL2   | DLG1     | 0.401  | 0.010288              |
| OSBPL11 | PRKX     | 0.387  | 0.013689              |
| WDR27   | NRARP    | -0.379 | 0.015998              |
| NEIL2   | ERN1     | -0.369 | 0.01921               |
| NEIL2   | SEMA5A   | 0.367  | 0.019681              |
| WDR27   | THAP1    | 0.358  | 0.023407              |
| OSBPL11 | DLG1     | 0.346  | 0.02866               |
| OSBPL11 | SEMA5A   | 0.342  | 0.030595              |
| OSBPL11 | CD34     | 0.335  | 0.034355              |
| MSMO1   | HMOX1    | -0.334 | 0.035032              |
| NEIL2   | NRARP    | -0.329 | 0.038012              |
| OSBPL11 | ACVRL1   | 0.324  | 0.041326              |
| OSBPL11 | HMOX1    | 0.318  | 0.045491              |
| NEIL2   | PROK2    | 0.316  | 0.046806              |

## References

- (1) T. Mamiya, F. Kanamori, K. Yokoyama, A. Ota, S. Karnan, K. Uda, Y. Araki, S. Maesawa, K. Yoshikawa, and R. Saito, Long noncoding RNA profile of the intracranial artery in patients with moyamoya disease. *J Neurosurg* 138 (2023) 709-716.
- (2) F. Kanamori, K. Yokoyama, A. Ota, K. Yoshikawa, S. Karnan, M. Maruwaka, K. Shimizu, S. Ota, K. Uda, Y. Araki, S. Okamoto, S. Maesawa, T. Wakabayashi, and A. Natsume, Transcriptome-wide analysis of intracranial artery in patients with moyamoya disease showing upregulation of immune response, and downregulation of oxidative phosphorylation and DNA repair. *Neurosurg Focus* 51 (2021) E3.
